# Supplementary material for: Effectiveness of Interventions to Improve the Anticholinergic Prescribing Practice in Older Adults: A Systematic Review
Source: MDPI journal article supplement (doi:10.3390/jcm11030714), 2022-01-28
Supplement: s1 [file s1]

**Supplementary Table S1.** MEDLINE search strategy

| Source                             | Search strategy: keyword/MeSH                                                                                                                                                                                                                                                                                                                                                                                                                                                                                                                                                                                                                                                                                                                                                                                                                                                                                                                                                                                                                                                                                                                                                                                                                                                                                                                                                                                                                                                                                                                                                                                                 |
|------------------------------------|-------------------------------------------------------------------------------------------------------------------------------------------------------------------------------------------------------------------------------------------------------------------------------------------------------------------------------------------------------------------------------------------------------------------------------------------------------------------------------------------------------------------------------------------------------------------------------------------------------------------------------------------------------------------------------------------------------------------------------------------------------------------------------------------------------------------------------------------------------------------------------------------------------------------------------------------------------------------------------------------------------------------------------------------------------------------------------------------------------------------------------------------------------------------------------------------------------------------------------------------------------------------------------------------------------------------------------------------------------------------------------------------------------------------------------------------------------------------------------------------------------------------------------------------------------------------------------------------------------------------------------|
| MEDLINE (Ovid) 1990 to August 2021 | <ol style="list-style-type: none"> <li>1. Anticholinergic.mp. or exp Cholinergic Antagonists/ (90034)</li> <li>2. anticholinergic*.mp. (12552)</li> <li>3. antimuscarinic#.mp. (773)</li> <li>4. Anticholinergic prescrib*.mp. (8)</li> <li>5. Muscarinic Antagonists.mp. or exp Muscarinic Antagonists/ (55192)</li> <li>6. Cholinergic Antagonists.mp. or exp Cholinergic Antagonists/ (84271)</li> <li>7. Parasympatholytics.mp. or exp Parasympatholytics/ (44696)</li> <li>8. cholinolytic*.mp. (598)</li> <li>9. Antimuscarinic prescrib*.mp. (2)</li> <li>10 1 or 2 or 3 or 4 or 5 or 6 or 7 or 8 or 9 (102500)</li> <li>11 intervention.mp. or exp Early Intervention, Educational/ or exp Early Medical Intervention/ (662546)</li> <li>12 Collaboration.mp. (80214)</li> <li>13 exp "Drug Utilization Review"/ or exp Medication Therapy Management/ or exp "Drug-Related Side Effects and Adverse Reactions"/ or Medication review.mp. or exp Medication Reconciliation/ (128503)</li> <li>14 exp Medical History Taking/ or exp Medication Errors/ or Medication history.mp. (40748)</li> <li>15 Integrated medicine management.mp. (2)</li> <li>16 Outreach Visi*.mp. (303)</li> <li>17 detailing.mp. (7444)</li> <li>18 Partnered.mp. (3137)</li> <li>19 Charting.mp. (3347)</li> <li>20 Adverse drug event.mp. (1109)</li> <li>21 ADE.mp. (2684)</li> <li>22 Medication safety.mp. (2533)</li> <li>23 drug safety.mp. (5581)</li> <li>24 Medication appropriateness.mp. (243)</li> <li>25 Inappropriate medi#.mp. (10)</li> <li>26 Inappropriate drug.mp. (527)</li> <li>27 Prescribing.mp. (50108)</li> </ol> |

---

|    |                                                                                                             |
|----|-------------------------------------------------------------------------------------------------------------|
| 28 | 11 or 12 or 13 or 14 or 15 or 16 or 17 or 18 or 19 or 20 or 21 or 22 or 23 or 24 or 25 or 26 or 27 (953366) |
| 29 | Aged.mp. or exp "Aged, 80 and over"/ or exp Aged/ (5533046)                                                 |
| 30 | older people.mp. (31764)                                                                                    |
| 31 | elderly.mp. (267270)                                                                                        |
| 32 | older adul#.mp. (8550)                                                                                      |
| 33 | geriatric*.mp. (107308)                                                                                     |
| 34 | 29 or 30 or 31 or 32 or 33 (5620543)                                                                        |
| 35 | 10 and 28 and 34 (1450)                                                                                     |
| 38 | limit 35 to (english language and humans and yr="1990 -Current") (677)                                      |

---

**Supplementary Table S2.** The Newcastle-Ottawa scale risk of bias assessment for included cohort studies

| <b>Author, Year, Country</b>             | <b>Study design</b>                                         | <b>Selection</b> | <b>Comparability</b> | <b>Outcome</b> |
|------------------------------------------|-------------------------------------------------------------|------------------|----------------------|----------------|
| Riordan et al., 2019, Ireland (46)       | A single group (pre- and post-comparison) feasibility study | ★ ★ ★            | ★ ★                  | ★ ★            |
| Ailabouni et al., 2019, New Zealand (47) | Convergent parallel mixed methods design (before and after) | ★ ★ ★            | ★ ★                  | ★ ★            |
| Hernandez et al., 2020, Spain (49)       | Prospective pre-post interventional study                   | ★ ★ ★            | ★ ★                  | ★ ★            |
| Lenander et al., 2018, Sweden (50)       | Cross-sectional                                             | ★ ★ ★ ★          | ★ ★                  | ★ ★ ★          |
| Weichert et al., 2018, Finland (42)      | Multi-centre observational study                            | ★ ★ ★ ★          | ★ ★                  | ★ ★ ★          |
| Lenander et al., 2017, Sweden (28)       | Interventional pilot study                                  | ★ ★ ★ ★          | ★ ★                  | ★ ★ ★          |
| Lagrange et al., 2017, France (51)       | Retrospective study                                         | ★ ★ ★            | ★ ★                  | ★ ★ ★          |

|                                           |                                        |         |     |       |
|-------------------------------------------|----------------------------------------|---------|-----|-------|
| Carnahan et al.,<br>2017, US (37)         | Quasi-<br>experimental<br>study design | ★ ★ ★ ★ | ★ ★ | ★ ★ ★ |
| Hanus et al.,<br>2016,<br>US (38)         | Observational<br>Pilot study           | ★ ★     | ★ ★ | ★ ★   |
| McLarin et al, 2016,<br>Australia (41)    | Retrospective<br>study                 | ★ ★ ★ ★ | ★ ★ | ★     |
| Kersten et al.,2015,<br>Norway (44)       | Retrospective<br>study                 | ★ ★ ★ ★ | ★ ★ | ★ ★ ★ |
| Ghibelli et al.,<br>2013,<br>Italy (52)   | Pre, post<br>study                     | ★ ★ ★   | ★ ★ | ★ ★   |
| Yeh et al.,<br>2013, Taiwan (53)          | Prospective<br>case–control<br>study   | ★ ★     | ★ ★ | ★ ★ ★ |
| Castelino et al ,<br>2010, Australia (20) | Retrospective<br>study                 | ★ ★ ★ ★ | ★ ★ | ★     |
| Nishtala et al.,2009,<br>Australia (40)   | Retrospective<br>study                 | ★ ★ ★ ★ | ★ ★ | ★ ★ ★ |
| Starner et al., 2009,<br>USA (36)         | Retrospective<br>study                 | ★ ★ ★ ★ | ★ ★ | ★ ★ ★ |

**Note:** A study can be given a maximum of one star for each numbered item within the *Selection* (maximum of 4 stars)) and *Outcome* categories (maximum of 3 stars). A maximum of two stars can be given for *Comparability*.

Thresholds for converting the Newcastle-Ottawa scale to Agency for Healthcare Research and Quality (AHRQ) standards (good, fair, and poor):

*Good quality:* 3 or 4 stars in selection domain AND 1 or 2 stars in comparability domain AND 2 or 3 stars in outcome/exposure domain

*Fair quality:* 2 stars in selection domain AND 1 or 2 stars in comparability domain AND 2 or 3 stars in outcome/exposure domain

*Poor quality:* 0 or 1 star in selection domain OR 0 stars in comparability domain OR 0 or 1 stars in outcome/exposure domain.

**Supplementary Table S3.** The Cochrane Risk of Bias tool results for included RCTs

| <b>Study</b>                              | <b>Study design</b>                  | <b>Randomisation<br/>sequence<br/>generation</b> | <b>Allocation<br/>concealment</b> | <b>Blinding of<br/>participants and<br/>personnel</b> | <b>Blinding<br/>outcome<br/>assessors</b> | <b>Loss to follow<br/>up<br/>(incomplete<br/>data)</b> | <b>Selective<br/>reporting</b> |
|-------------------------------------------|--------------------------------------|--------------------------------------------------|-----------------------------------|-------------------------------------------------------|-------------------------------------------|--------------------------------------------------------|--------------------------------|
| Kersten et al.,2013,<br>Norway (45)       | RCT, single-<br>blinded              | ✓                                                | X                                 | X                                                     | ?                                         | X                                                      | ✓                              |
| van Eijk et al, 2001,<br>Netherlands (54) | RCT                                  | X                                                | ✓                                 | X                                                     | X                                         | ?                                                      | ✓                              |
| Boustani et al.,2012,<br>US (39)          | RCT                                  | ✓                                                | ?                                 | X                                                     | X                                         | ✓                                                      | ✓                              |
| Juola et al., 2015,<br>Finland (43)       | Cluster RCT                          | ✓                                                | ?                                 | X                                                     | X                                         | ✓                                                      | ✓                              |
| Toivo et al., 2019,<br>Belgium (48)       | Two-arm,<br>parallel, cluster<br>RCT | ?                                                | ?                                 | X                                                     | X                                         | ✓                                                      | ✓                              |
| Moga et al., 2017,<br>USA (27)            | Parallel arm<br>RCT                  | ✓                                                | ✓                                 | X                                                     | X                                         | ✓                                                      | ✓                              |
| Gnjidic et al., 2010,<br>Australia (21)   | Cluster RCT                          | ✓                                                | ✓                                 | X                                                     | X                                         | ✓                                                      | ✓                              |

X = inadequate; ✓ = adequate; ? = unclear

RCT = Randomised controlled trial
